# Supplementary material for: The effect of a freeze–thaw cycle on dissolved nitrogen dynamics and its relation to dissolved organic matter and soil microbial biomass in the soil of a northern hardwood forest
Source: Springer Nature journal article supplement (doi:10.1007/s10533-019-00537-w), 2019-01-18
Supplement: 10533_2019_537_MOESM1_ESM.pdf [file 10533_2019_537_MOESM1_ESM.pdf]

## Electronic supplementary materials

Title: The effect of a freeze–thaw cycle on dissolved nitrogen dynamics and its relation to dissolved organic matter and soil microbial biomass in the soil of a northern hardwood forest

Authors: Tsunehiro Watanabe, Ryunosuke Tatenno, Shogo Imada, Karibu Fukuzawa, Kazuo Isobe, Rieko Urakawa, Tomoki Oda, Nanae Hosokawa, Takahiro Sasai, Yoshiyuki Inagaki, Takuo Hishi, Hiroto Toda and Hideaki Shibata

Submitted to *Biogeochemistry*

Article DOI: [10.1007/s10533-019-00537-w](https://doi.org/10.1007/s10533-019-00537-w)

Figures S-1 – S-6

Tables S-1 & S-2

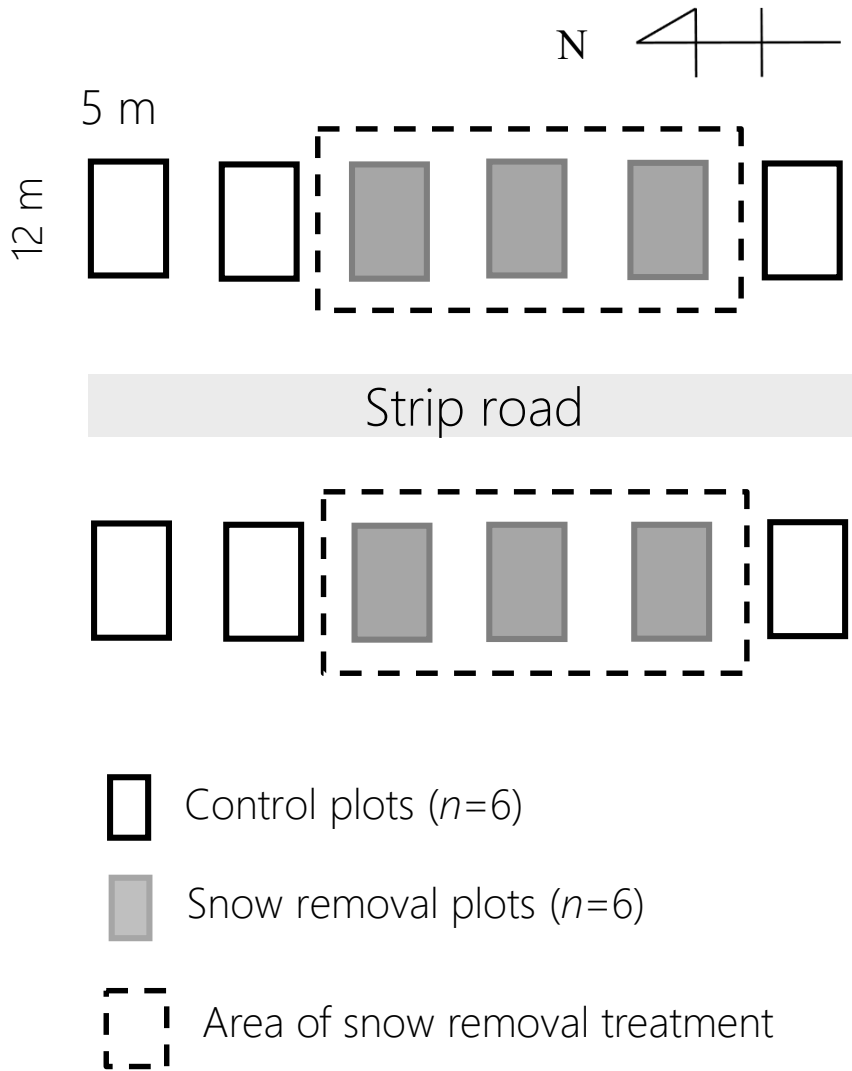

Figure S-1. Design and spatial location of the experimental plots.

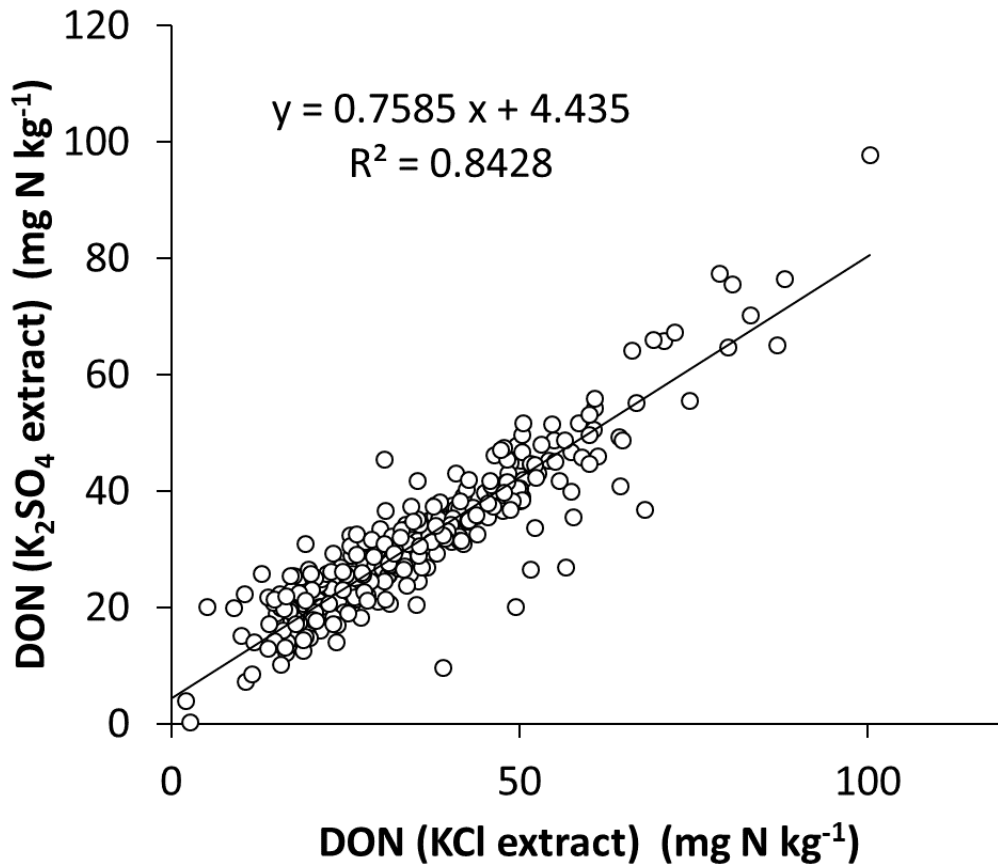

Figure S-2. Empirical relationship of dissolved organic nitrogen (DON) contents in soil between two different methods for dissolved inorganic nitrogen (DIN) ( $=\text{NH}_4^+ + \text{NO}_3^-$ ) analysis. DON was calculated as  $\text{DON} = \text{TDN (total dissolved N)} - \text{DIN}$ . The DON (KCl extract) was calculated using DIN data extracted by KCl, while the DON (K<sub>2</sub>SO<sub>4</sub> extract) was calculated using DIN data extracted by K<sub>2</sub>SO<sub>4</sub>. The TDN content was obtained using the same data extracted by K<sub>2</sub>SO<sub>4</sub> for all samples. Refer to the methods section in the manuscript for detailed extraction methods for each. The empirical equation in this figure was applied for DON data on 7 and 16 April and 14 May 2014 because of the technical errors in the chemical analysis for the DIN contents.

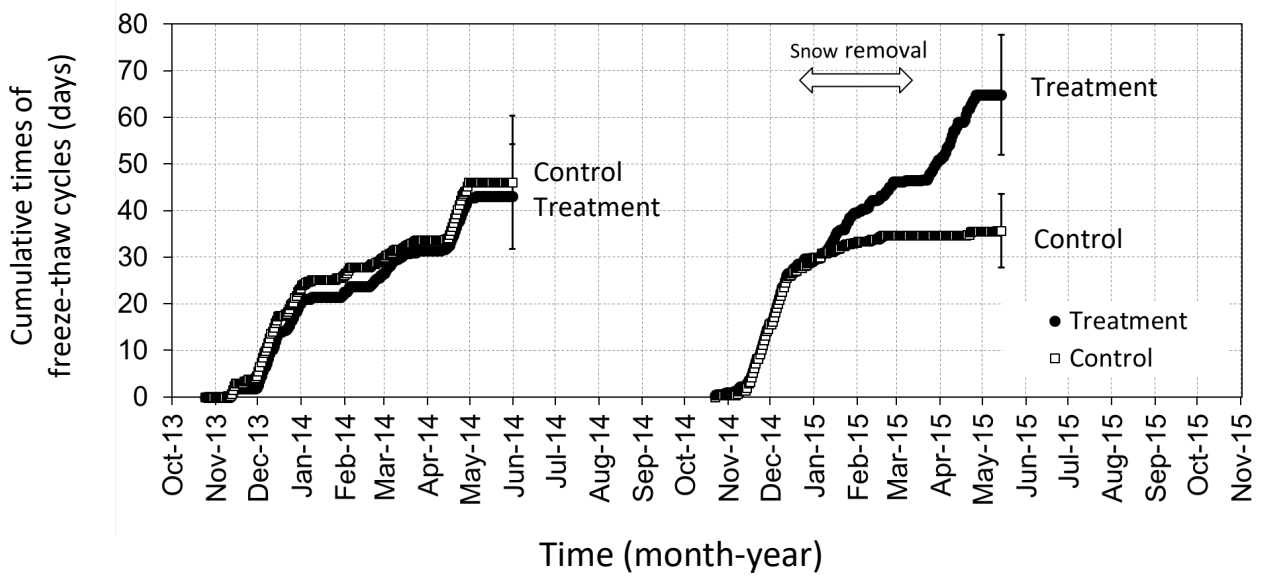

Figure S-3. Cumulative numbers (days) of freeze–thaw cycles at the control and treatment plots for pretreatment and treatment periods. The bar of the last data point in each period represents the standard deviation for the total number in each period (n = 6).

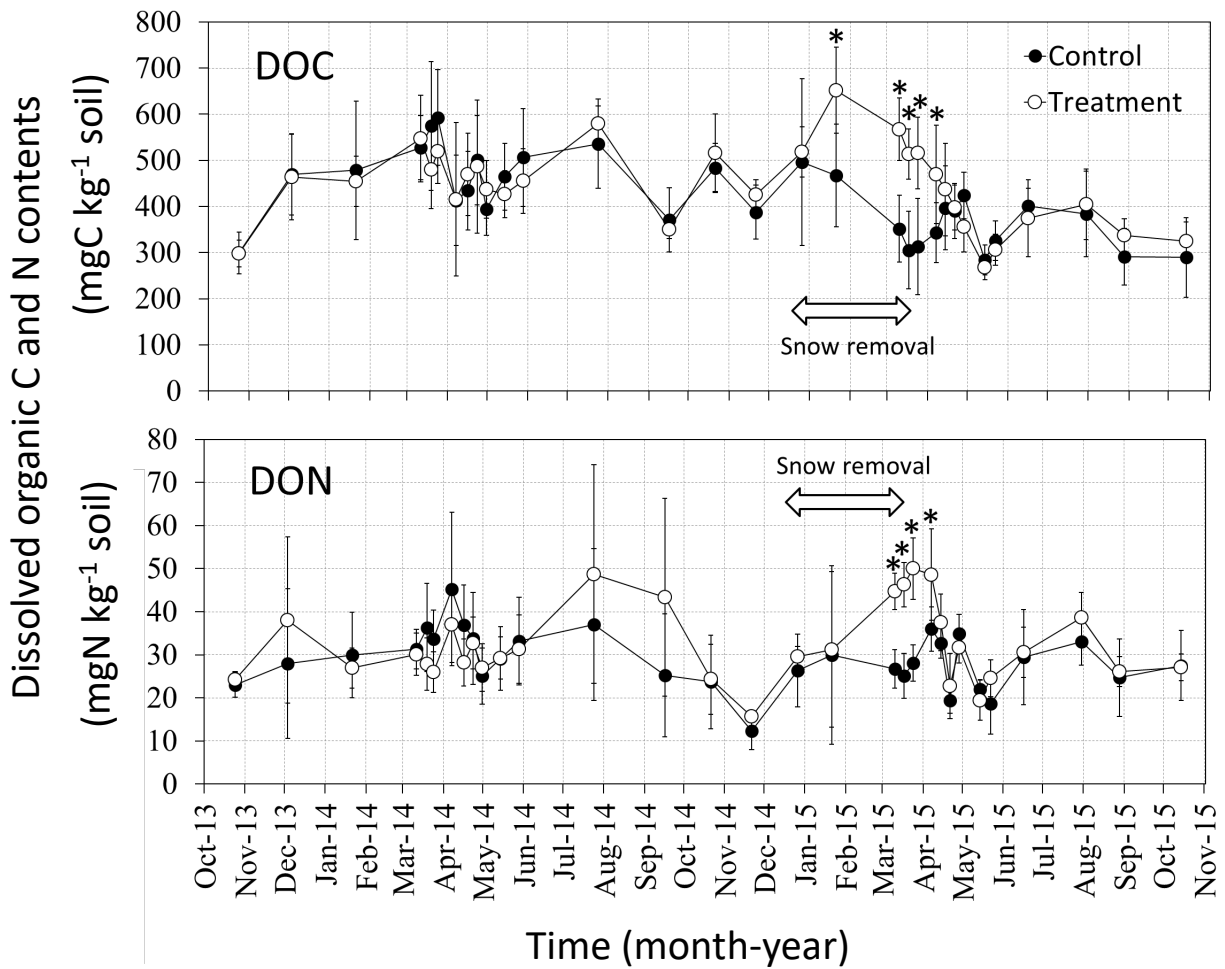

Figure S-4. Temporal changes in dissolved organic carbon (DOC) (upper) and dissolved organic nitrogen (DON) (lower) content in 0–10 cm depth soil at the control and treatment plots. Each bar of the plot indicates the standard deviation of six plots. The asterisks near the plot indicate significant differences (t-test,  $P < 0.05$ ) between the control and treatment plots for each observation day.

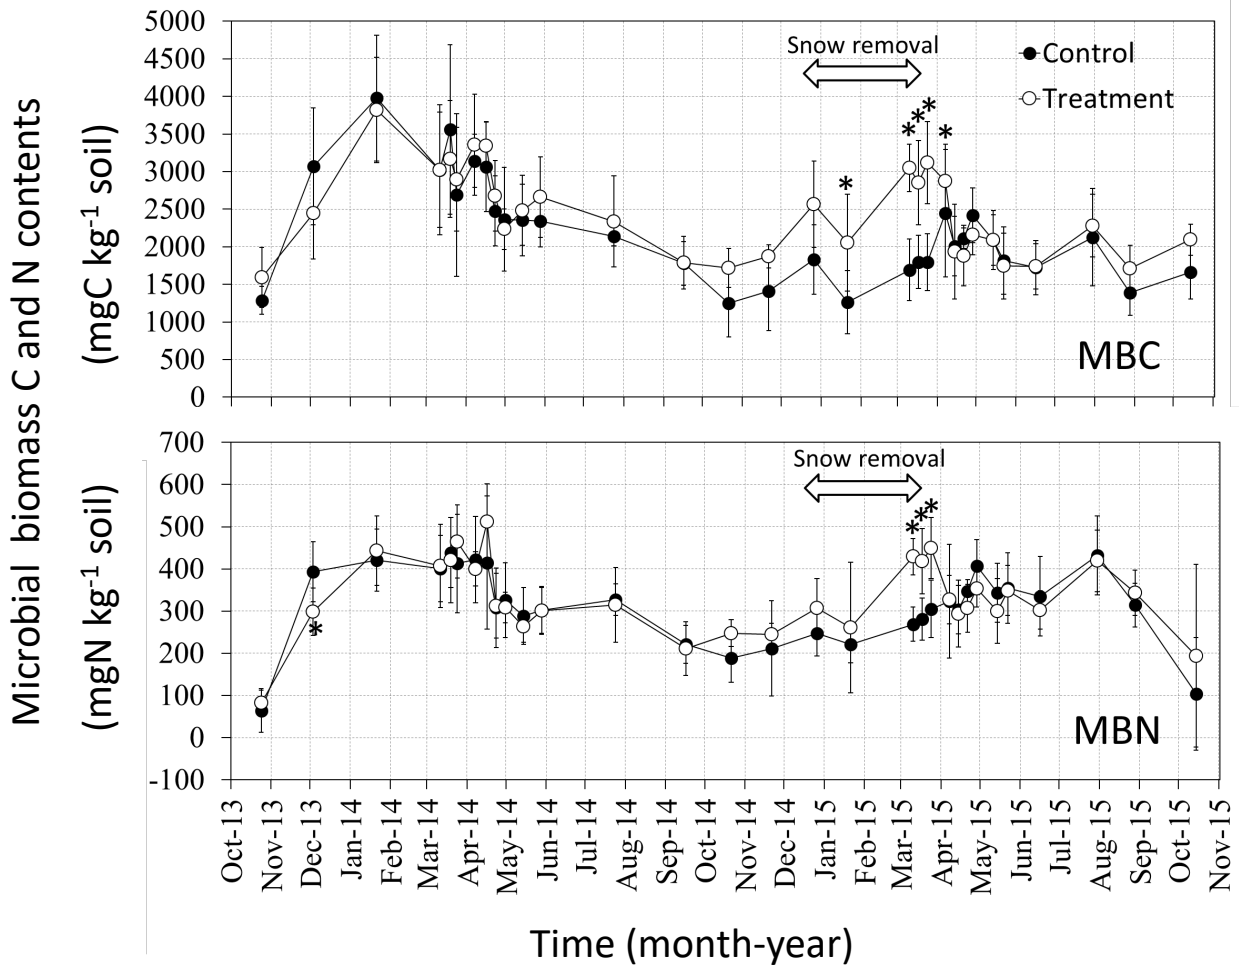

Figure S-5. Temporal changes in soil microbial carbon (MBC) (upper) and soil microbial nitrogen (MBN) (lower) content in 0–10 cm depth soil at the control and treatment plots. Each bar of the plot indicates the standard deviation of six plots. The asterisks near the plot indicate significant differences (t-test,  $P < 0.05$ ) between the control and treatment plots for each observation day.

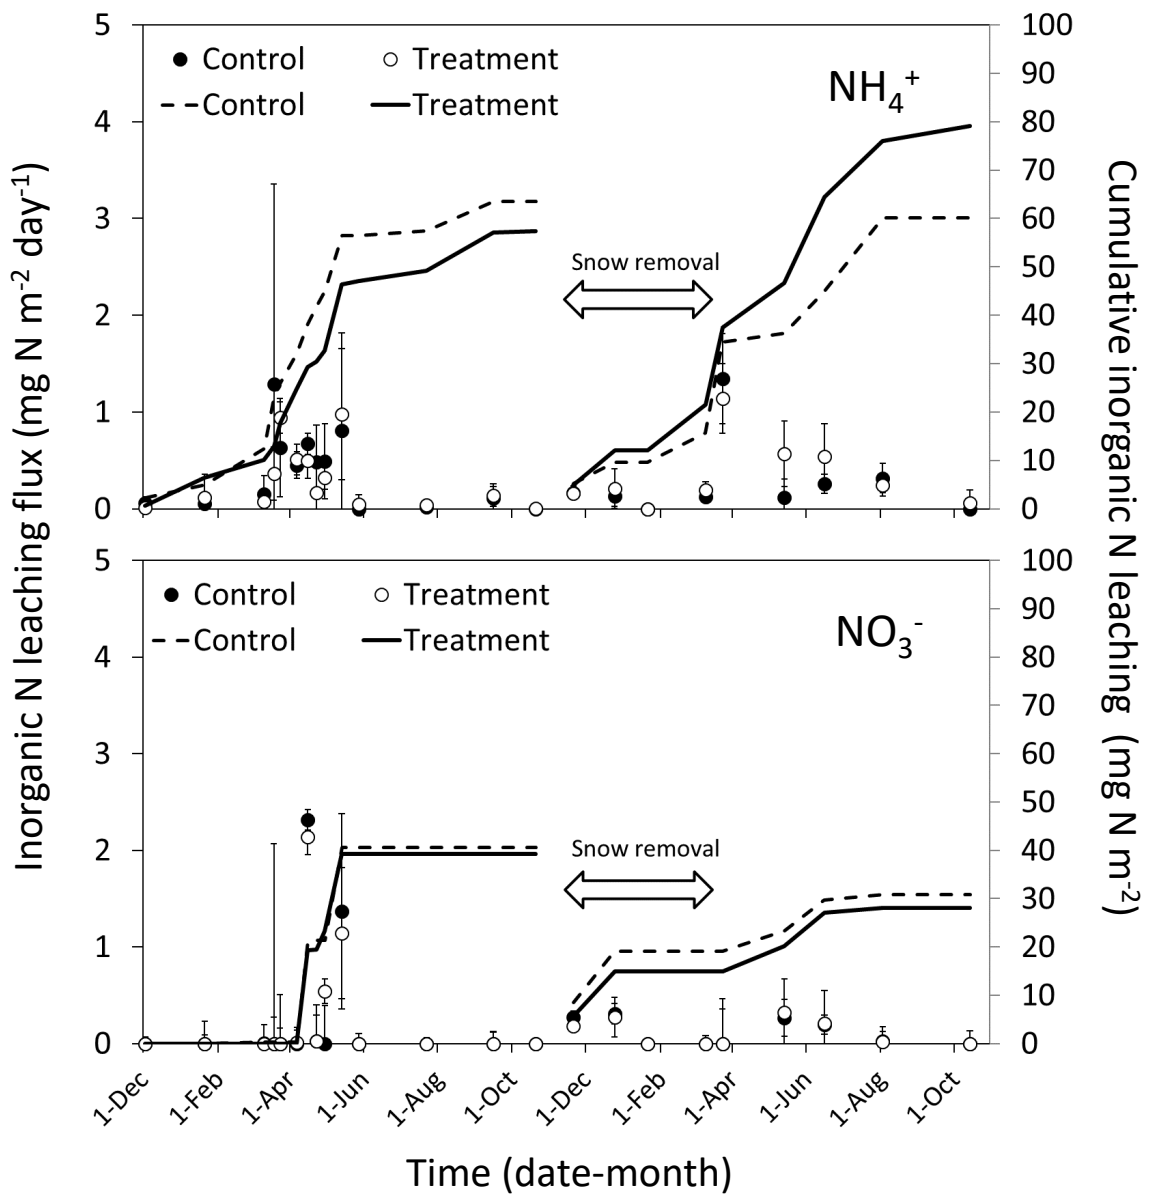

Figure S-6. Ammonium (upper) and nitrate (lower) leaching from soil at 20 cm depth at the control and treatment plots. The plots represent the leaching rate ( $\text{mg m}^{-2} \text{ day}^{-1}$ ) in each incubation period. The bar on the plot indicates the standard deviation of six plots. The lines represent the cumulative leaching amount ( $\text{mg m}^{-2}$ ) in the pretreatment and treatment periods.

Table S-1. Net production rates (mg N kg<sup>-1</sup> period<sup>-1</sup>) of ammonium (NH<sub>4</sub><sup>+</sup>) and nitrate (NO<sub>3</sub><sup>-</sup>) in soil at 0-10 cm depth in each plot during the dormant and growing seasons (average ± standard deviation) and the results of three-way ANOVA.

| Period         | Net NH <sub>4</sub> <sup>+</sup> -N production |             |             |             | Net NO <sub>3</sub> <sup>-</sup> -N production |            |             |             |
|----------------|------------------------------------------------|-------------|-------------|-------------|------------------------------------------------|------------|-------------|-------------|
|                | Dormant                                        |             | Growing     |             | Dormant                                        |            | Growing     |             |
|                | Control                                        | Treatment   | Control     | Treatment   | Control                                        | Treatment  | Control     | Treatment   |
| Pre-treatment  | 27.3±32.1a                                     | 13.7±11.9ab | -21.9±20.1b | 12.1±25.7ab | 36.8±13.4b                                     | 21.5±12.3b | 142.6±63.7a | 160.4±55.9a |
| Post-treatment | 1.08±25.2a                                     | 11.0±13.9a  | 4.86±7.54a  | 10.9±31.2a  | 17.9±7.63b                                     | 26.4±8.26b | 134.8±25.2a | 156.5±48.8a |

### Three-way ANOVA

#### Net NH<sub>4</sub><sup>+</sup>-N production

|                           |        |
|---------------------------|--------|
| Treatment                 | n.s.   |
| Year                      | n.s.   |
| Season                    | n.s.   |
| Treatment × Year          | n.s.   |
| Treatment × Season        | n.s.   |
| Year × Season             | P<0.05 |
| Treatment × Year × Season | n.s.   |

#### Net NO<sub>3</sub><sup>-</sup>-N production

|                           |         |
|---------------------------|---------|
| Treatment                 | n.s.    |
| Year                      | n.s.    |
| Season                    | P<0.001 |
| Treatment × Year          | n.s.    |
| Treatment × Season        | n.s.    |
| Year × Season             | n.s.    |
| Treatment × Year × Season | n.s.    |

Different lower letter indicate significant difference among plots in each year and each inorganic N production, respectively (Tukey's HSD test, n=6). NS means insignificant difference (P>0.05).



Table S-2. Gross rates of nitrate ( $\text{NO}_3^-$ ) and ammonium ( $\text{NH}_4^+$ ) production, consumption, and their net production in each plot during the dormant and growing seasons.

| Year                                         | Day     | $\text{NH}_4^+-\text{N}$ ( $\text{mg kg}^{-1} \text{ day}^{-1}$ ) |            |             |              |            |             | $\text{NO}_3^--\text{N}$ ( $\text{mg kg}^{-1} \text{ day}^{-1}$ ) |           |             |             |            |             |
|----------------------------------------------|---------|-------------------------------------------------------------------|------------|-------------|--------------|------------|-------------|-------------------------------------------------------------------|-----------|-------------|-------------|------------|-------------|
|                                              |         | Production                                                        |            | Consumption |              | Net rates  |             | Production                                                        |           | Consumption |             | Net rates  |             |
|                                              |         | Control                                                           | Treatment  | Control     | Treatment    | Control    | Treatment   | Control                                                           | Treatment | Control     | Treatment   | Control    | Treatment   |
| <u>Dormant season (incubated at 4 °C)</u>    |         |                                                                   |            |             |              |            |             |                                                                   |           |             |             |            |             |
| 2014                                         | 21-Jan. | 2.93±2.68                                                         | 1.23±1.10  | 6.56±1.38   | 1.27±0.42*** | -3.63±1.30 | -0.03±1.30* | 1.89±1.33                                                         | 0.91±0.54 | 0.70±0.15   | 0.76±0.52   | 1.19±1.33  | 0.15±0.57   |
|                                              | 17-Mar. | 2.95±0.88                                                         | 1.90±1.06  | 1.63±0.84   | 1.61±0.76    | 1.32±0.72  | 0.29±0.41*  | 0.25±0.09                                                         | 0.26±0.23 | 0.47±0.26   | 0.29±0.13   | -0.22±0.24 | -0.03±0.17  |
|                                              | 7-Apr.  | 2.47±0.59                                                         | 1.44±0.53* | 2.50±0.97   | 1.55±0.64    | -0.03±0.97 | -0.12±0.91  | 0.15±0.09                                                         | 0.25±0.17 | 0.23±0.27   | 0.25±0.15   | -0.08±0.31 | -0.003±0.11 |
|                                              | 28-Apr. | 1.68±0.00                                                         | 2.18±0.96  | 0.01±0.07   | 1.55±0.64    | 0.04±0.00  | -0.58±0.75  | 0.15±0.04                                                         | 0.14±0.12 | 0.01±0.07   | 0.05±0.03   | 0.14±0.03  | 0.09±0.10   |
| 2015                                         | 21-Jan. | 1.47±0.65                                                         | 0.73±0.42  | 2.33±1.11   | 2.02±1.66    | -0.85±0.72 | -1.29±1.83  | 0.65±0.53                                                         | 0.26±0.26 | 1.06±1.05   | 0.72±0.55   | 0.38±1.56  | -0.75±0.92  |
|                                              | 17-Mar. | 1.54±0.63                                                         | 3.05±1.27† | 1.05±0.37   | 2.22±1.99    | 0.48±0.77  | 0.82±1.29   | 0.46±0.23                                                         | 0.52±0.31 | 0.10±0.07   | 0.59±0.27** | 0.41±0.25  | -0.07±0.45† |
|                                              | 7-Apr.  | 1.87±0.71                                                         | 1.96±1.23  | 0.97±0.92   | 1.68±1.17    | 0.90±1.14  | 0.28±0.99   | 0.26±0.19                                                         | 0.40±0.30 | 0.16±0.10   | 0.32±0.26   | 0.19±0.33  | 0.42±0.34   |
|                                              | 28-Apr. | 2.65±0.50                                                         | 2.00±0.96  | 2.06±1.15   | 1.59±0.81    | 0.59±1.36  | 0.42±0.60   | 0.26±0.13                                                         | 0.31±0.29 | 0.07±0.05   | 0.10±0.09   | 0.22±0.14  | 0.32±0.38   |
| <u>Growing season (incubated at 9–17 °C)</u> |         |                                                                   |            |             |              |            |             |                                                                   |           |             |             |            |             |
| 2015                                         | 31-Jul. | 3.84±1.10                                                         | 4.10±1.50  | 4.17±1.31   | 3.19±1.28    | -0.32±0.46 | 0.90±2.39   | 1.49±0.57                                                         | 1.34±0.52 | 0.52±0.29   | 0.42±0.16   | 1.16±0.63  | 1.19±0.33   |
|                                              | 28-Aug. | 3.74±1.03                                                         | 3.26±0.61  | 4.24±1.14   | 3.29±0.94    | -0.49±0.96 | -0.03±0.60  | 1.32±1.04                                                         | 0.85±0.70 | 0.47±0.30   | 0.61±0.34   | 1.43±0.93  | 1.45±1.02   |
|                                              | 14-Oct. | 1.62±0.43                                                         | 1.42±0.73  | 1.41±0.55   | 1.91±0.79    | 0.21±0.84  | -0.49±1.43  | 0.54±0.33                                                         | 0.30±0.20 | 0.42±0.36   | 0.13±0.07   | 0.76±0.40  | 0.28±0.25   |

Asterisks indicate significant difference at the control and snow removal plots ( $t$ -test,  $n=6$ , † $P < 0.1$ ; \* $P < 0.05$ ; \*\* $P < 0.01$ ; \*\*\* $P < 0.001$ ).
